# Supplementary material for: Formation of Abasic Oligomers in Nonenzymatic Polymerization of Canonical Nucleotides
Source: MDPI journal article supplement (doi:10.3390/life9030057), 2019-07-04

**Supplementary Figure S1:** HPLC chromatograms of oligomerization reactions.  
(Reproduced from [4])

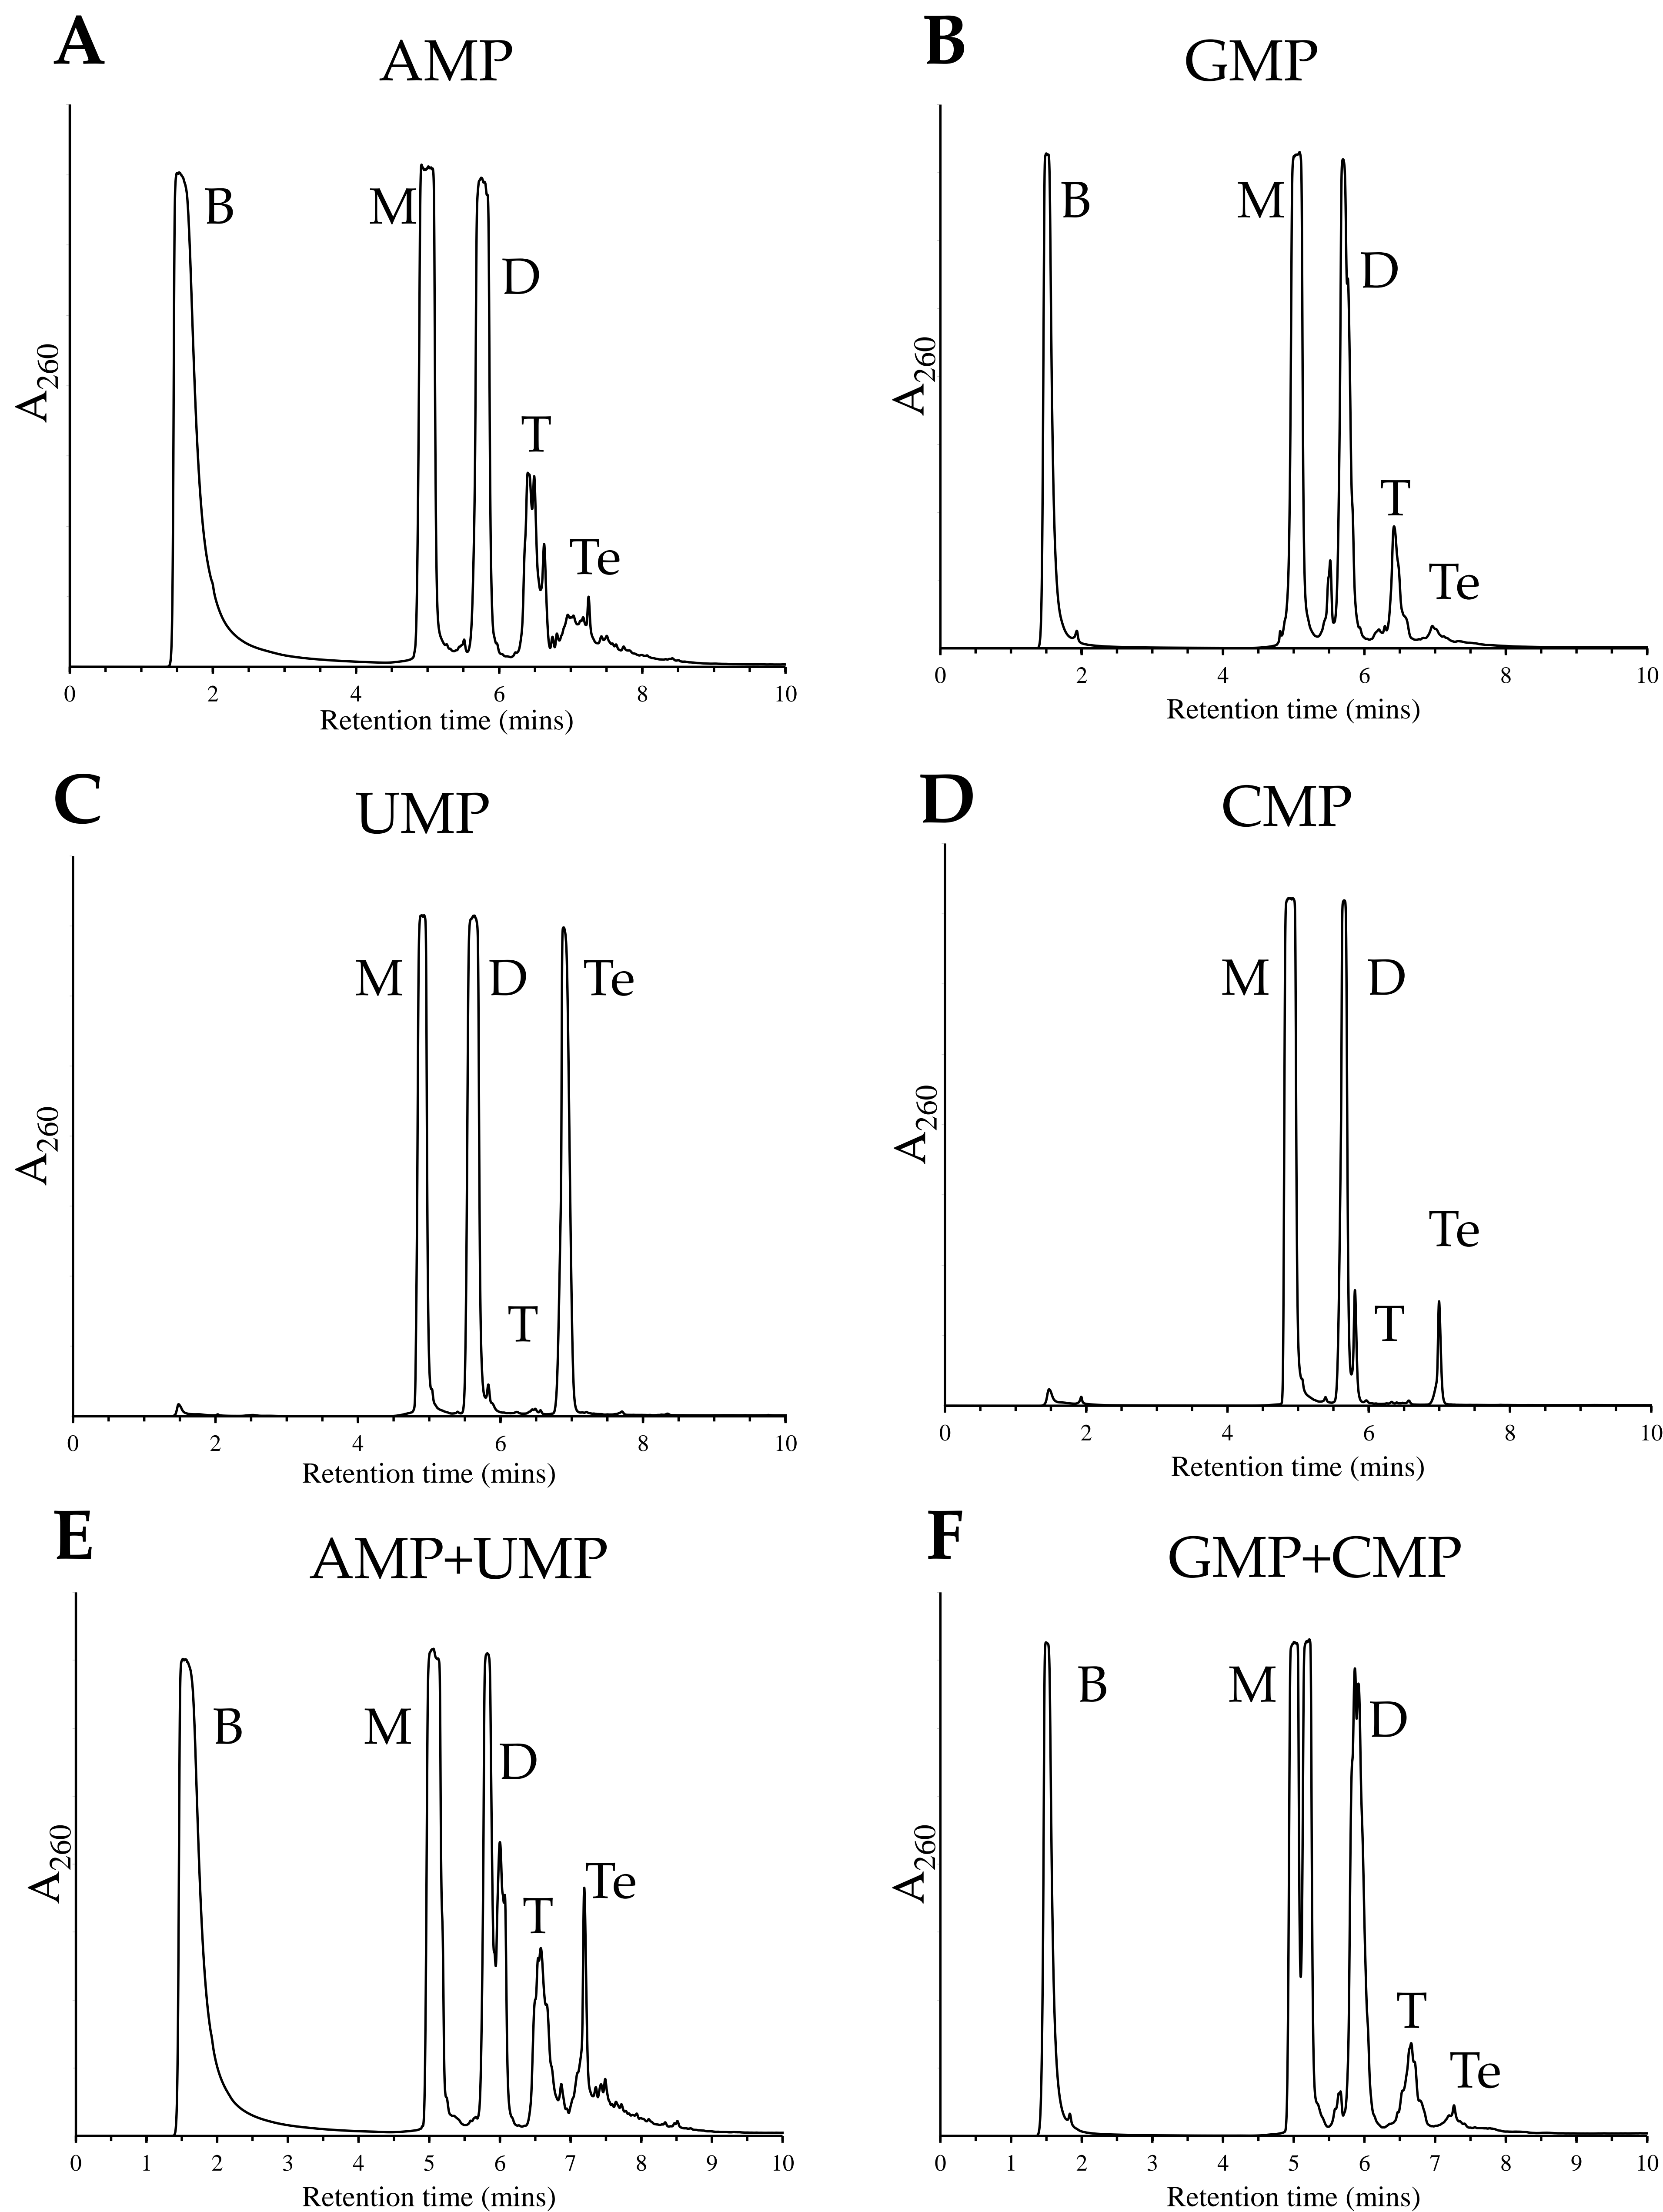

Legend: B: Breakdown; M: Monomer; D: Dimer; T: Trimer; Te: Tetramer

# Supplementary Figure S2: Mass spectrums of nucleotide monomer controls showing presence of free bases due to fragmentation.

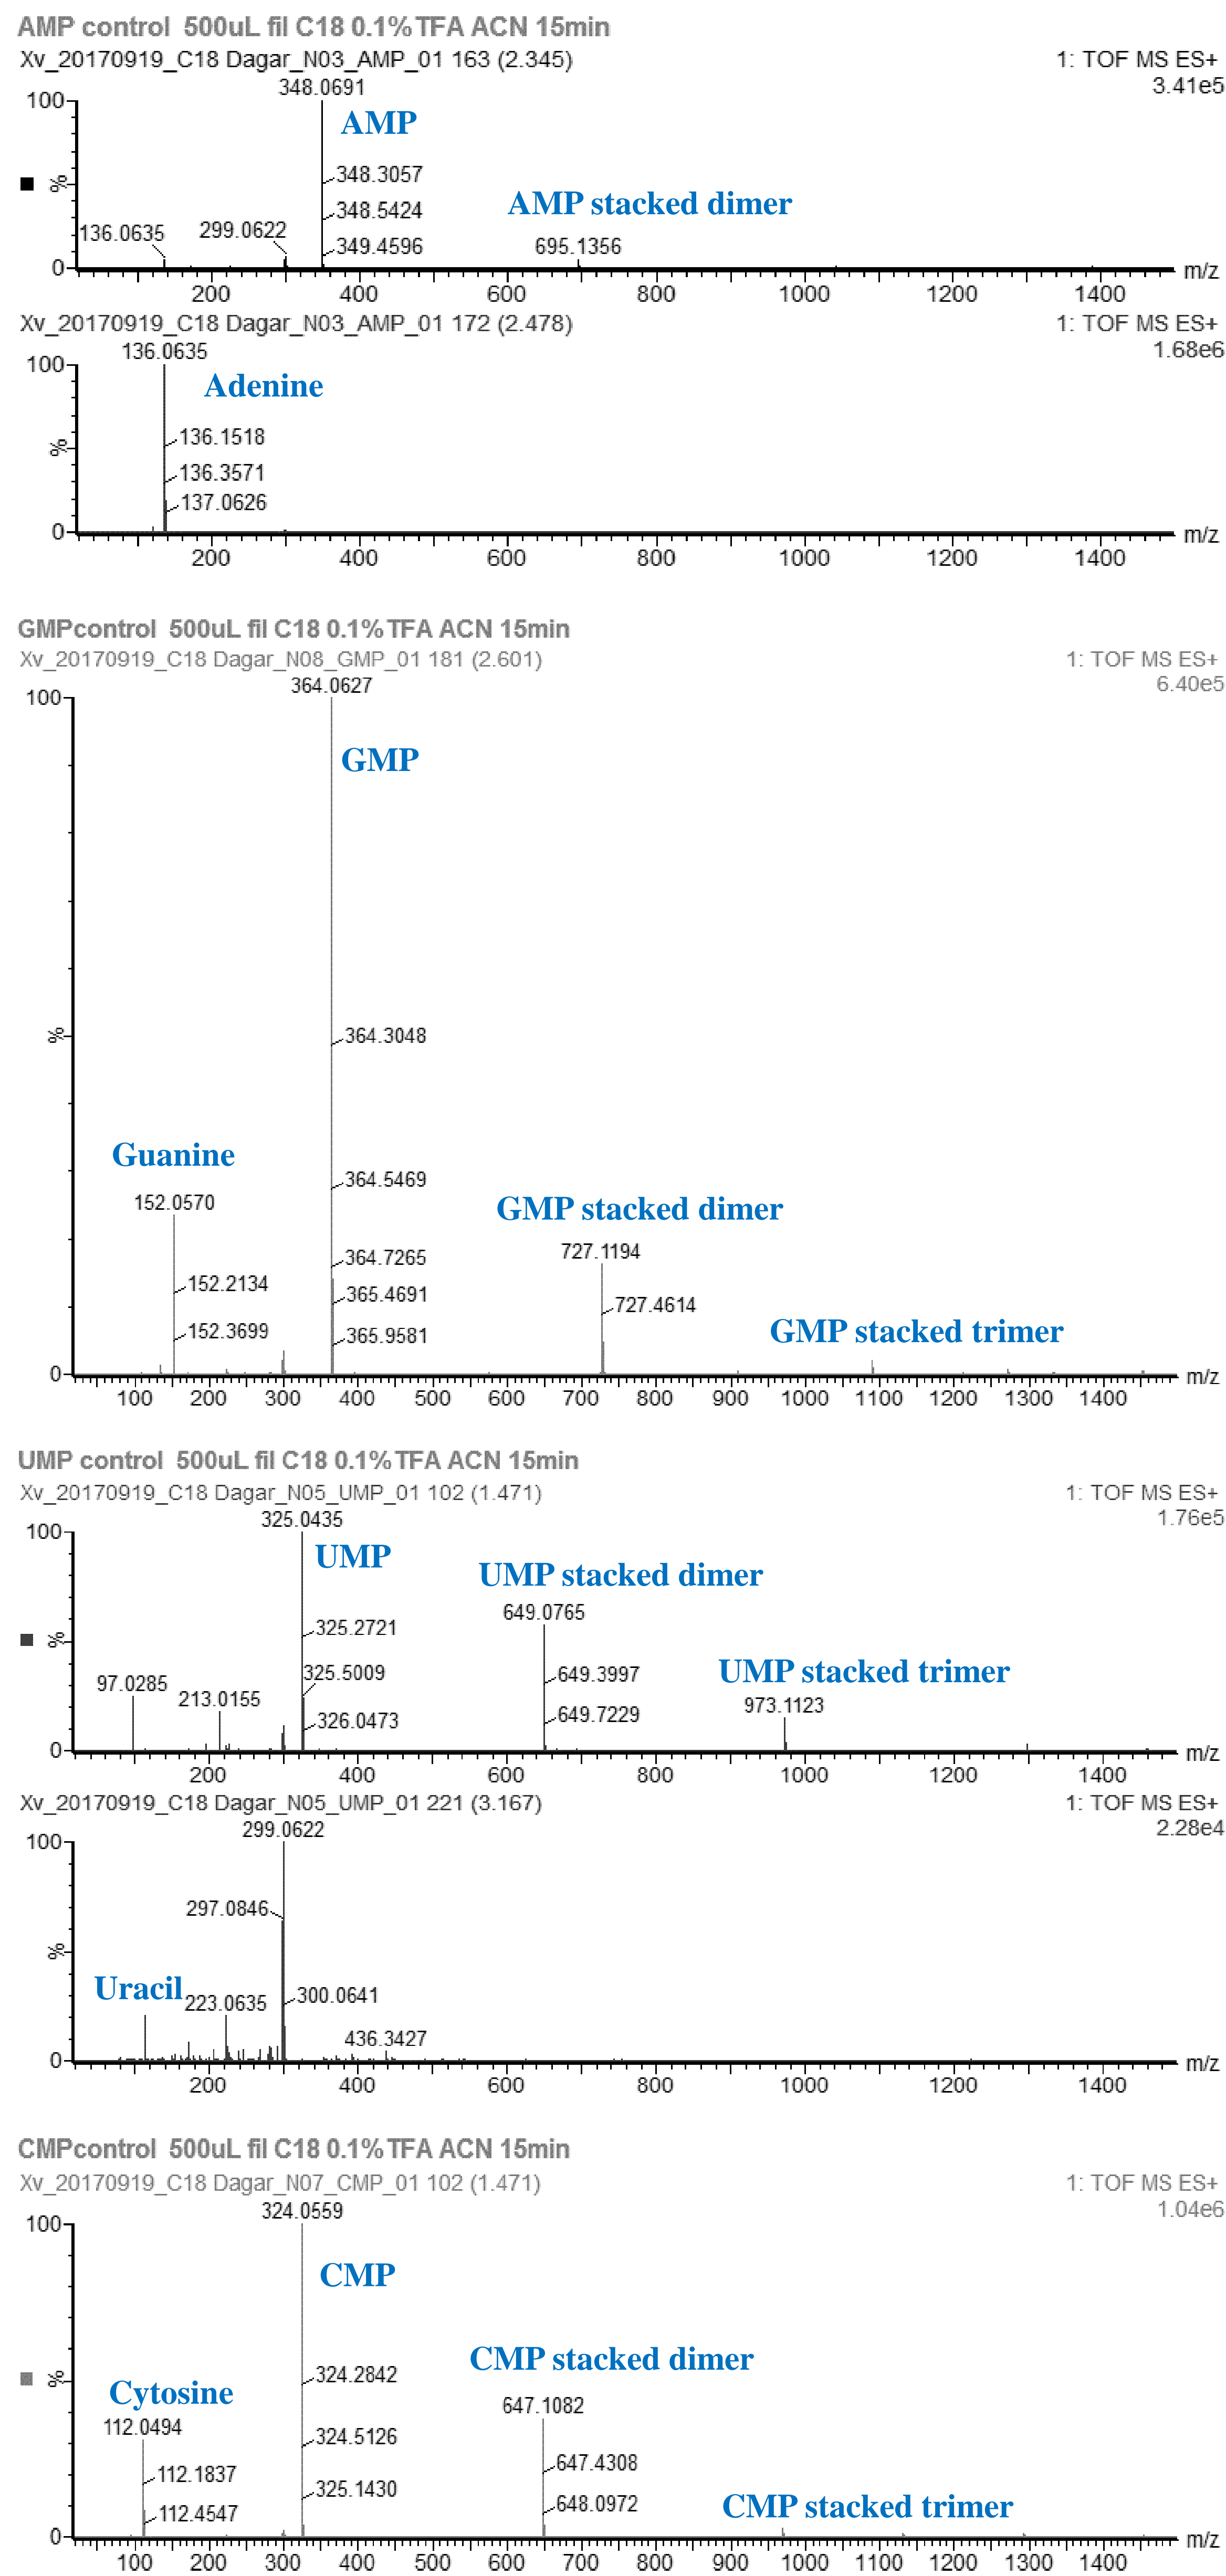

**Supplementary Figure S3:** Potential chemical structures of dimers and trimer based on the masses observed.

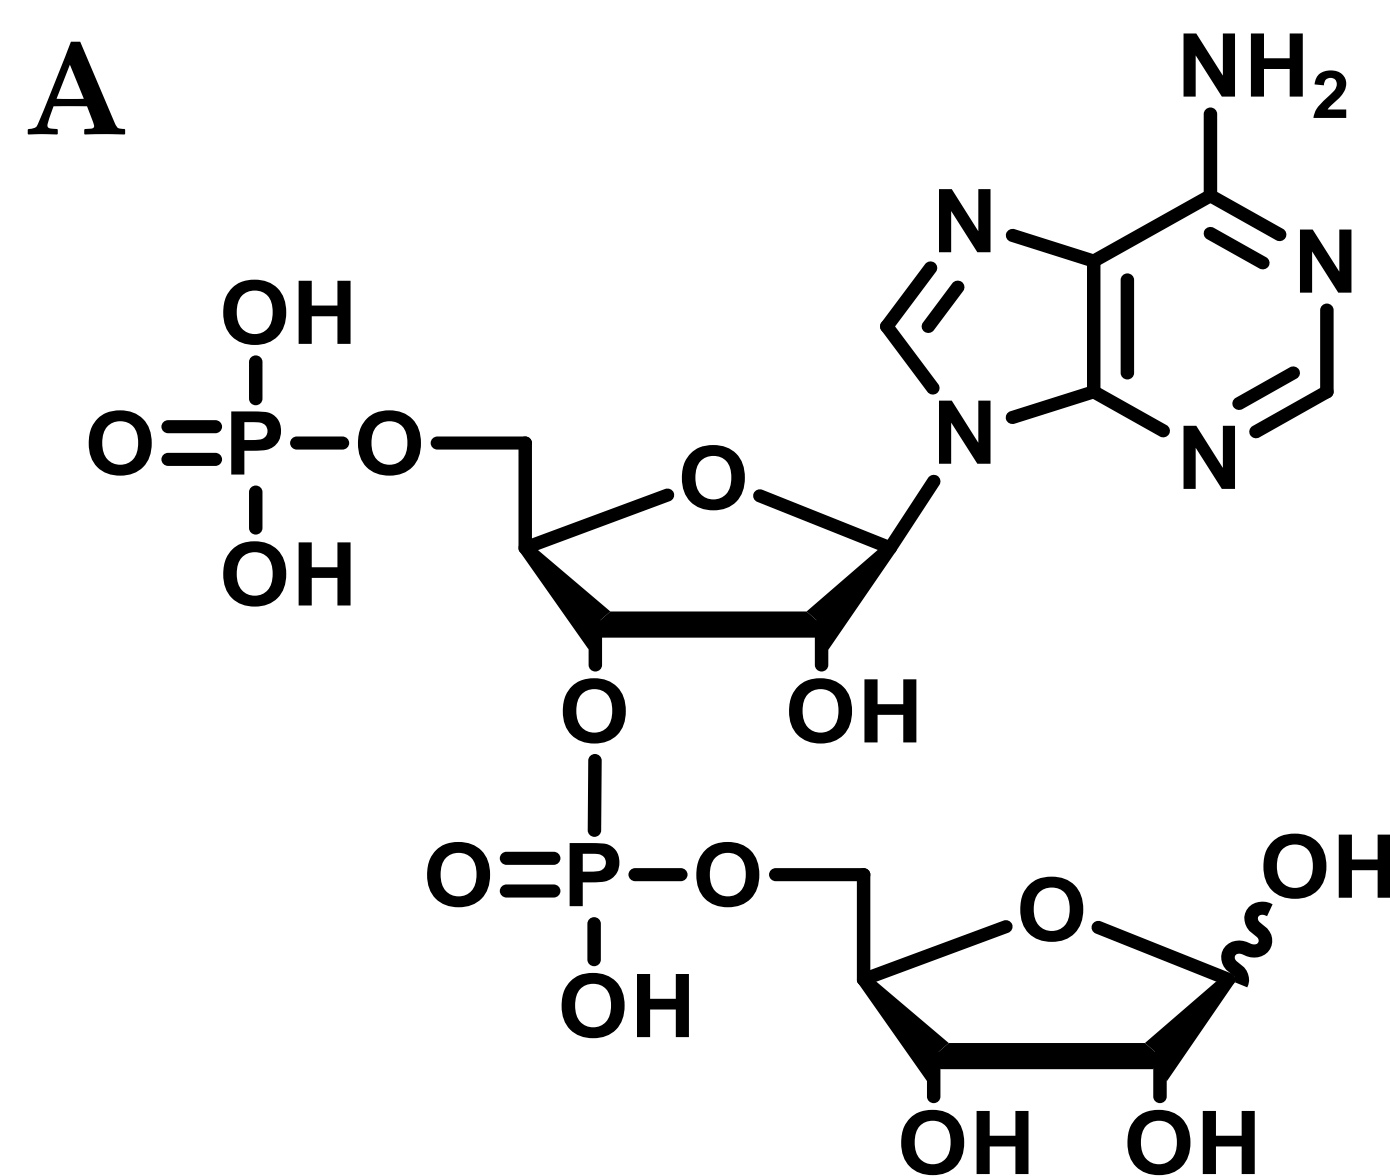

Abasic AMP Dimer

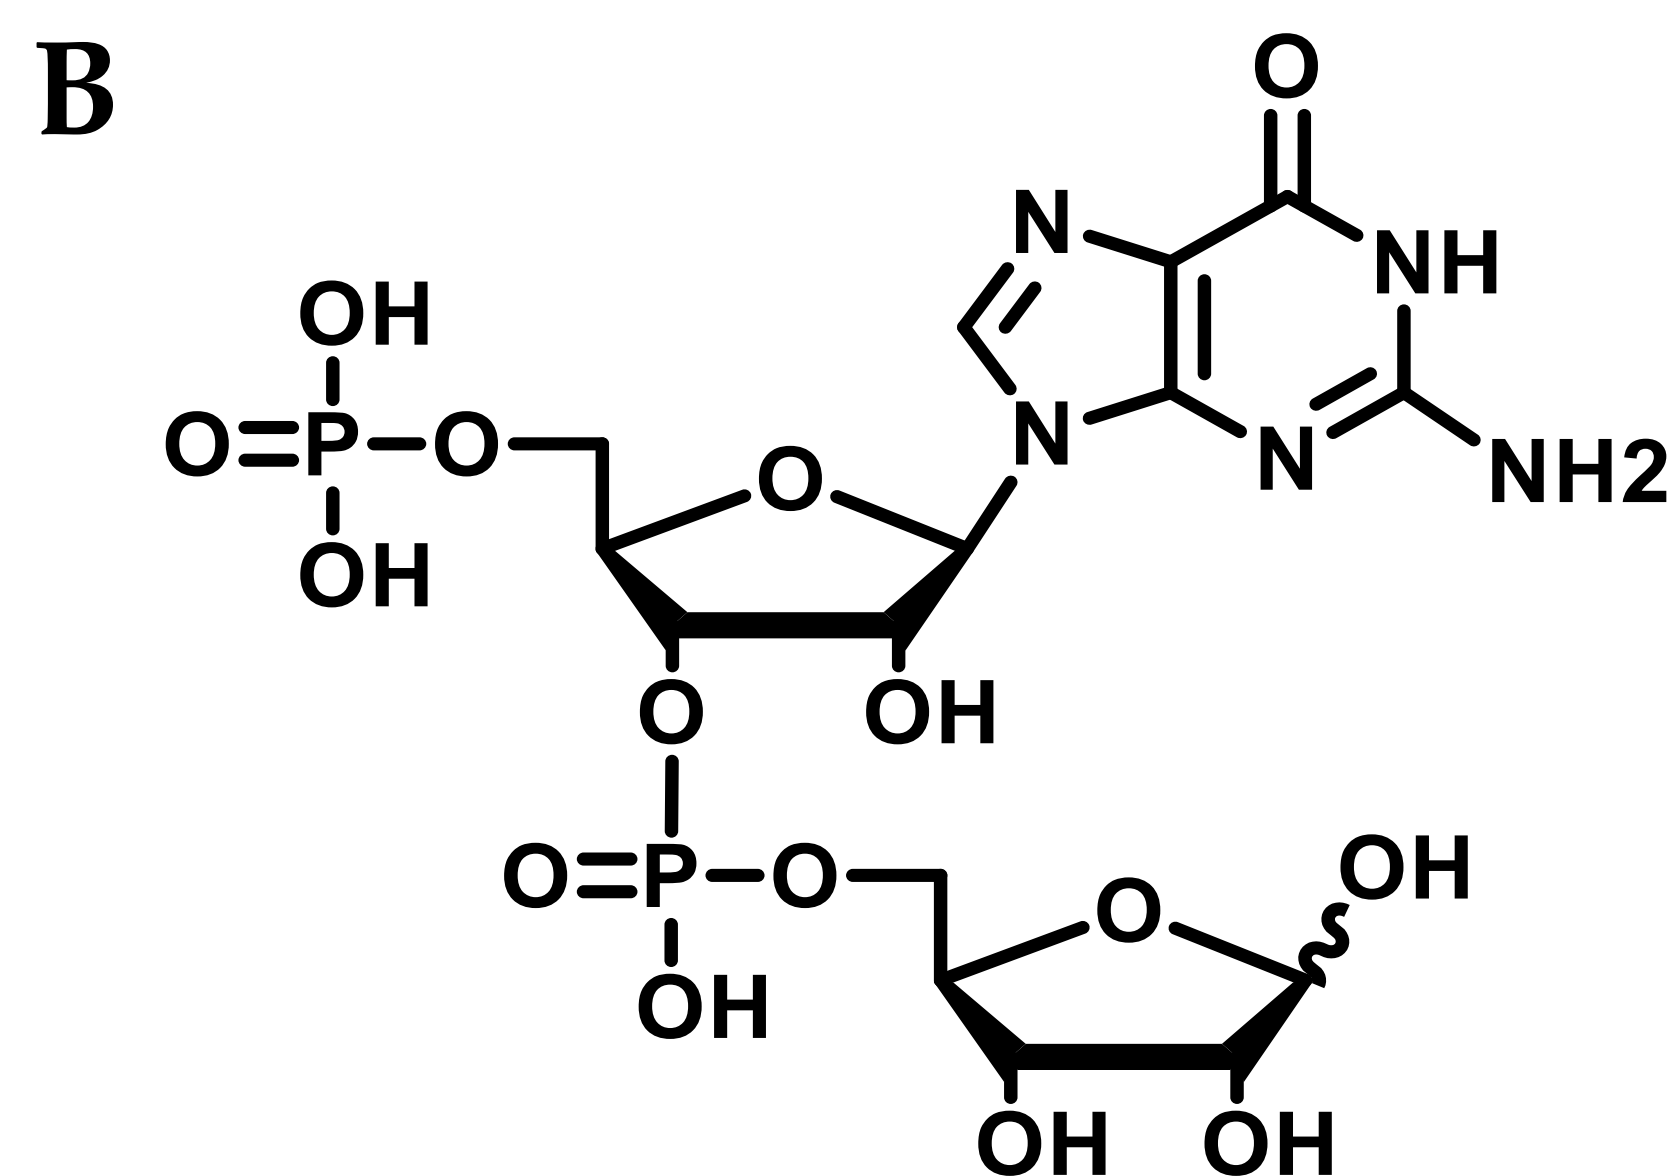

Abasic GMP Dimer

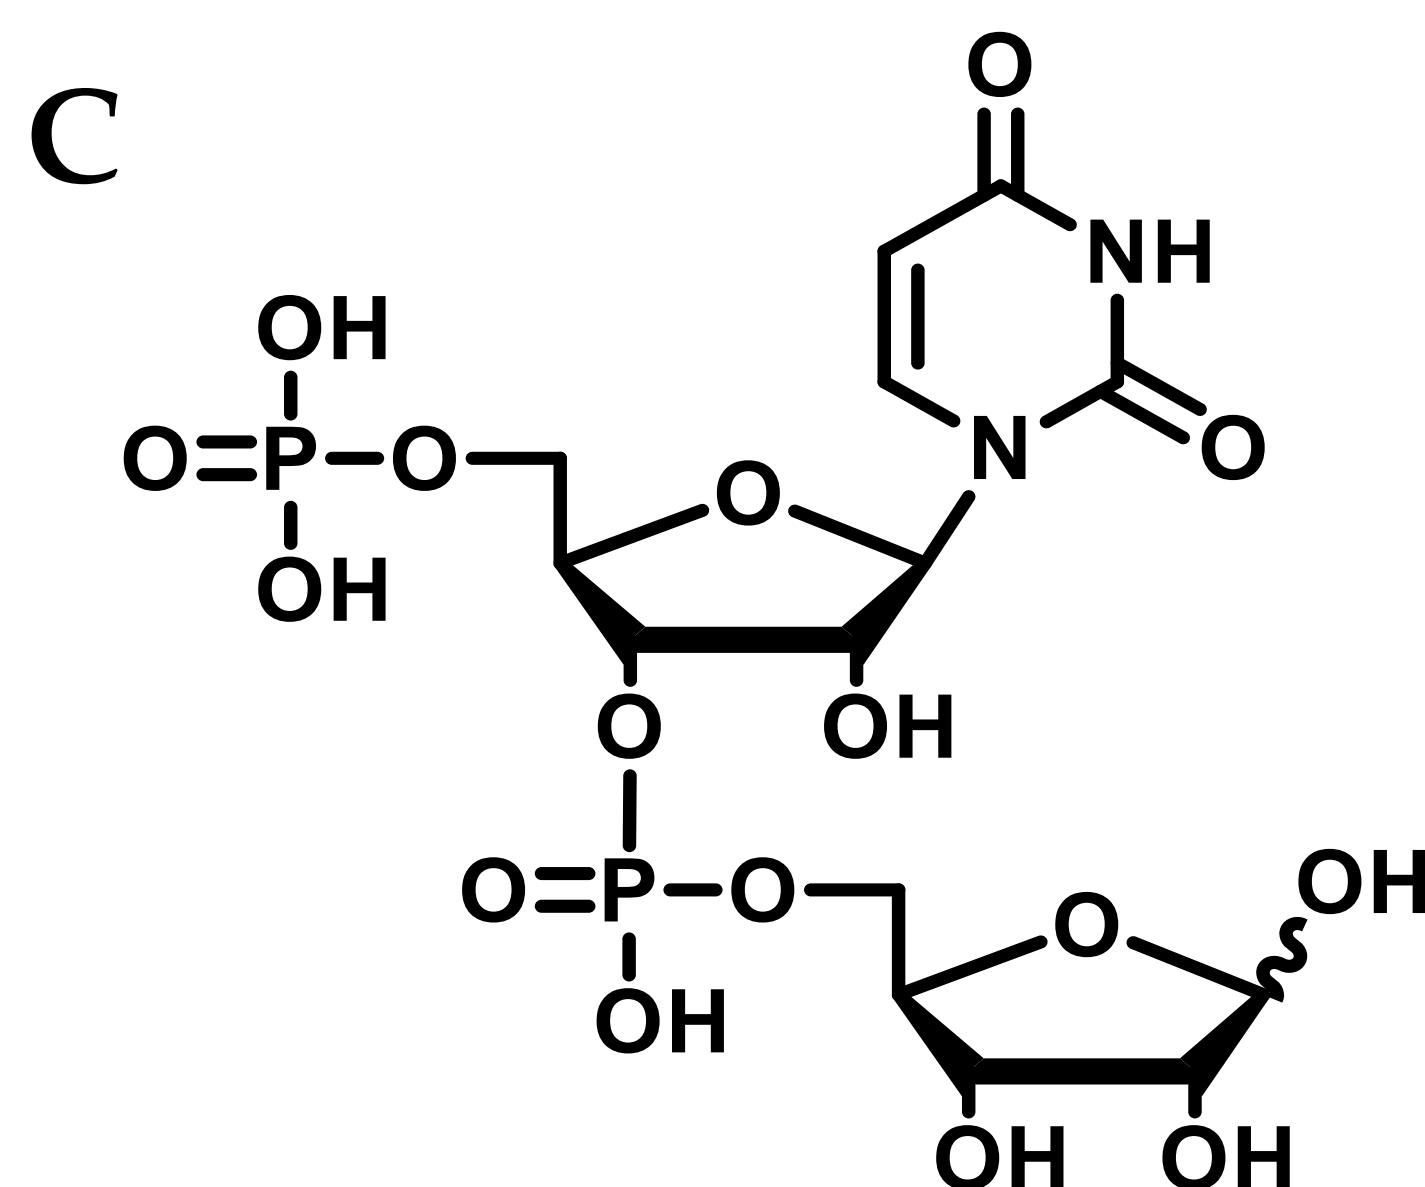

Abasic UMP Dimer

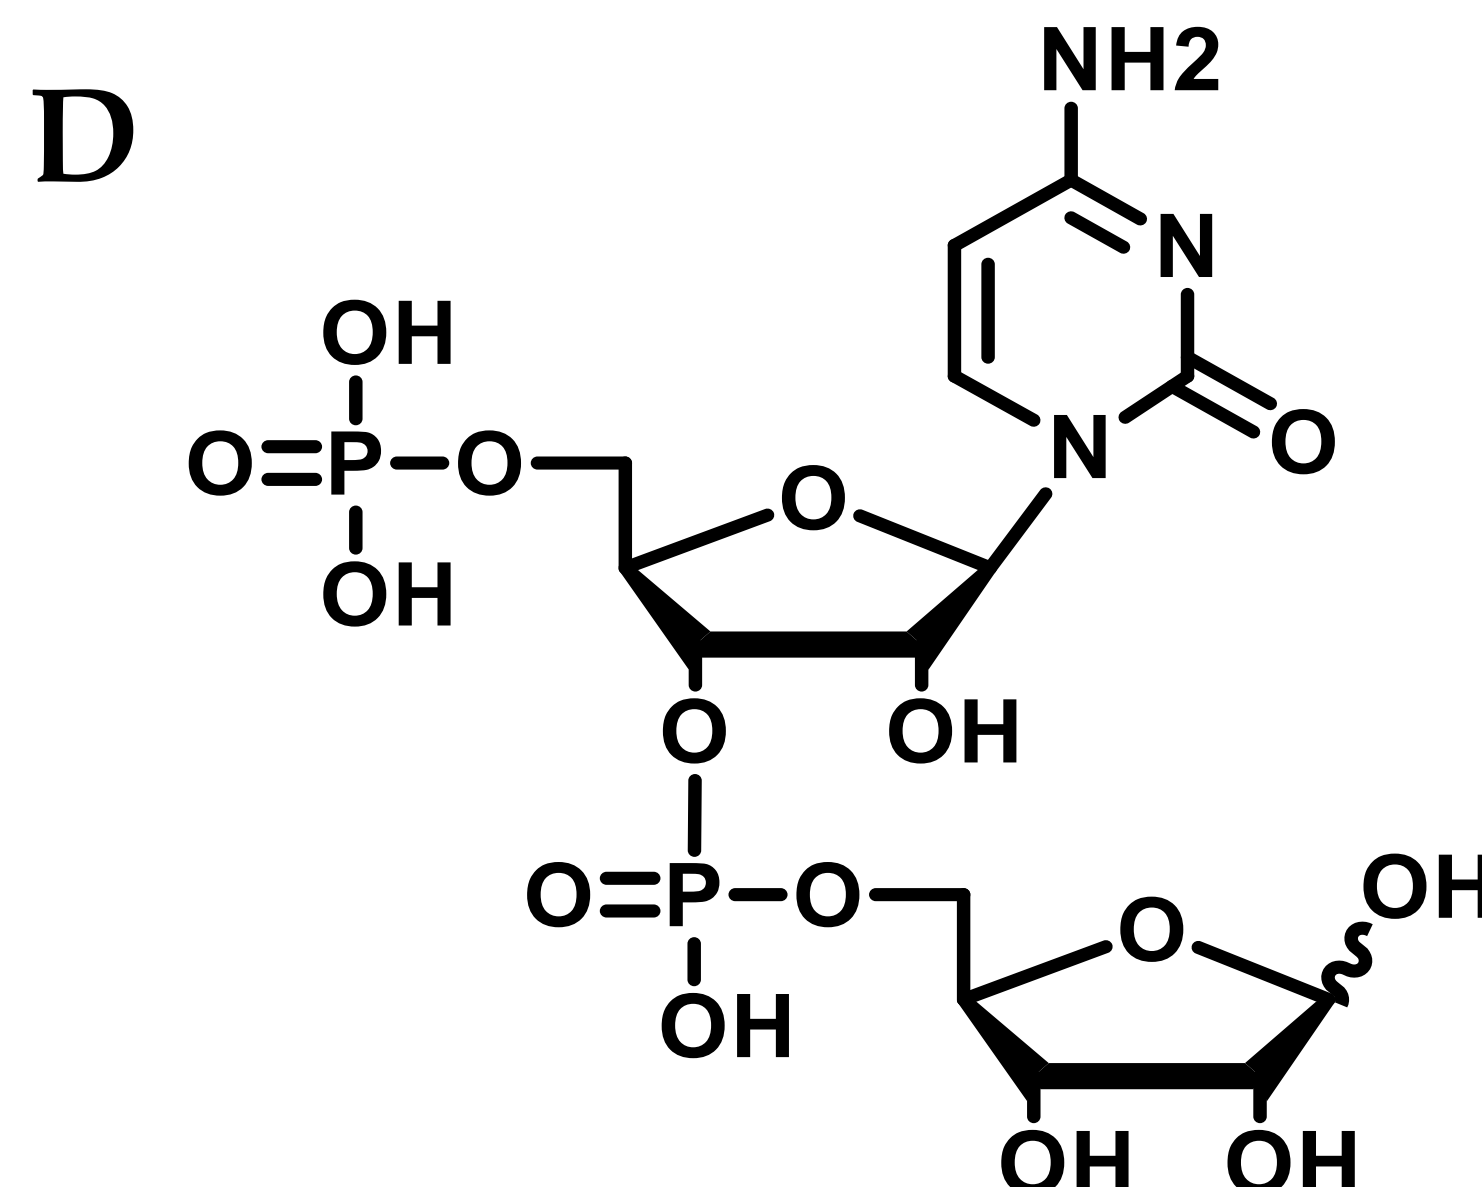

Abasic CMP Dimer

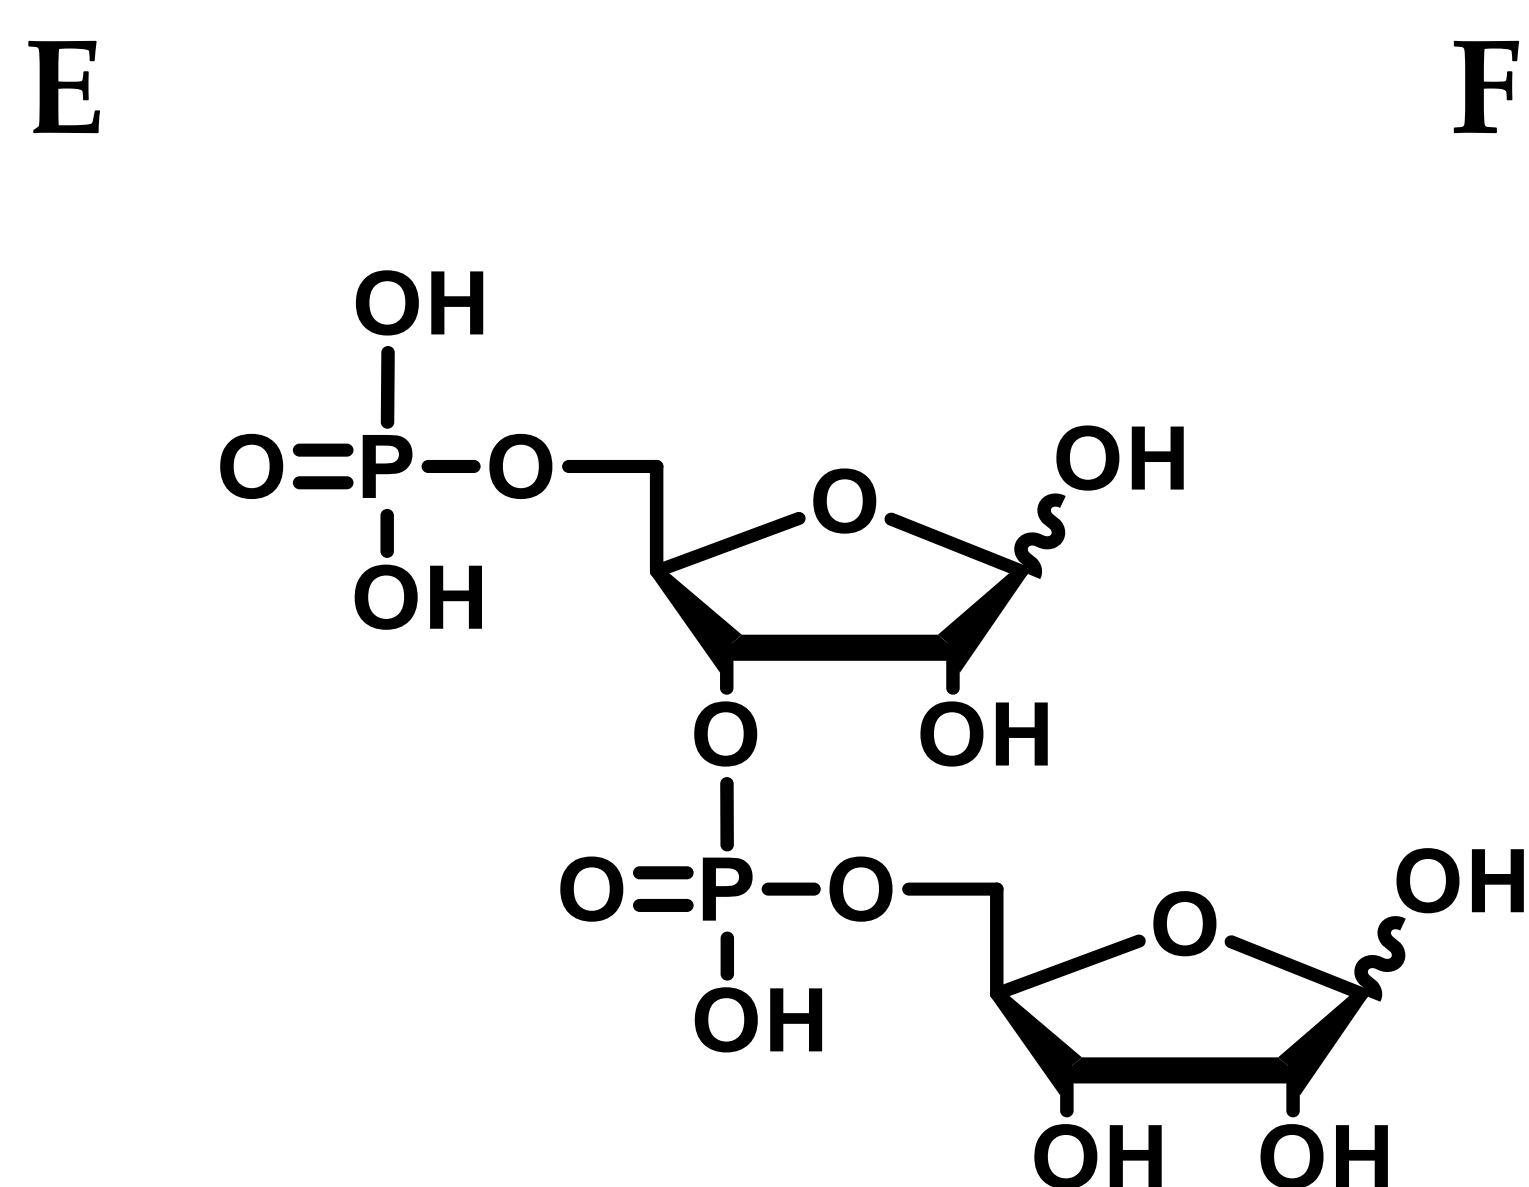

rMP Dimer

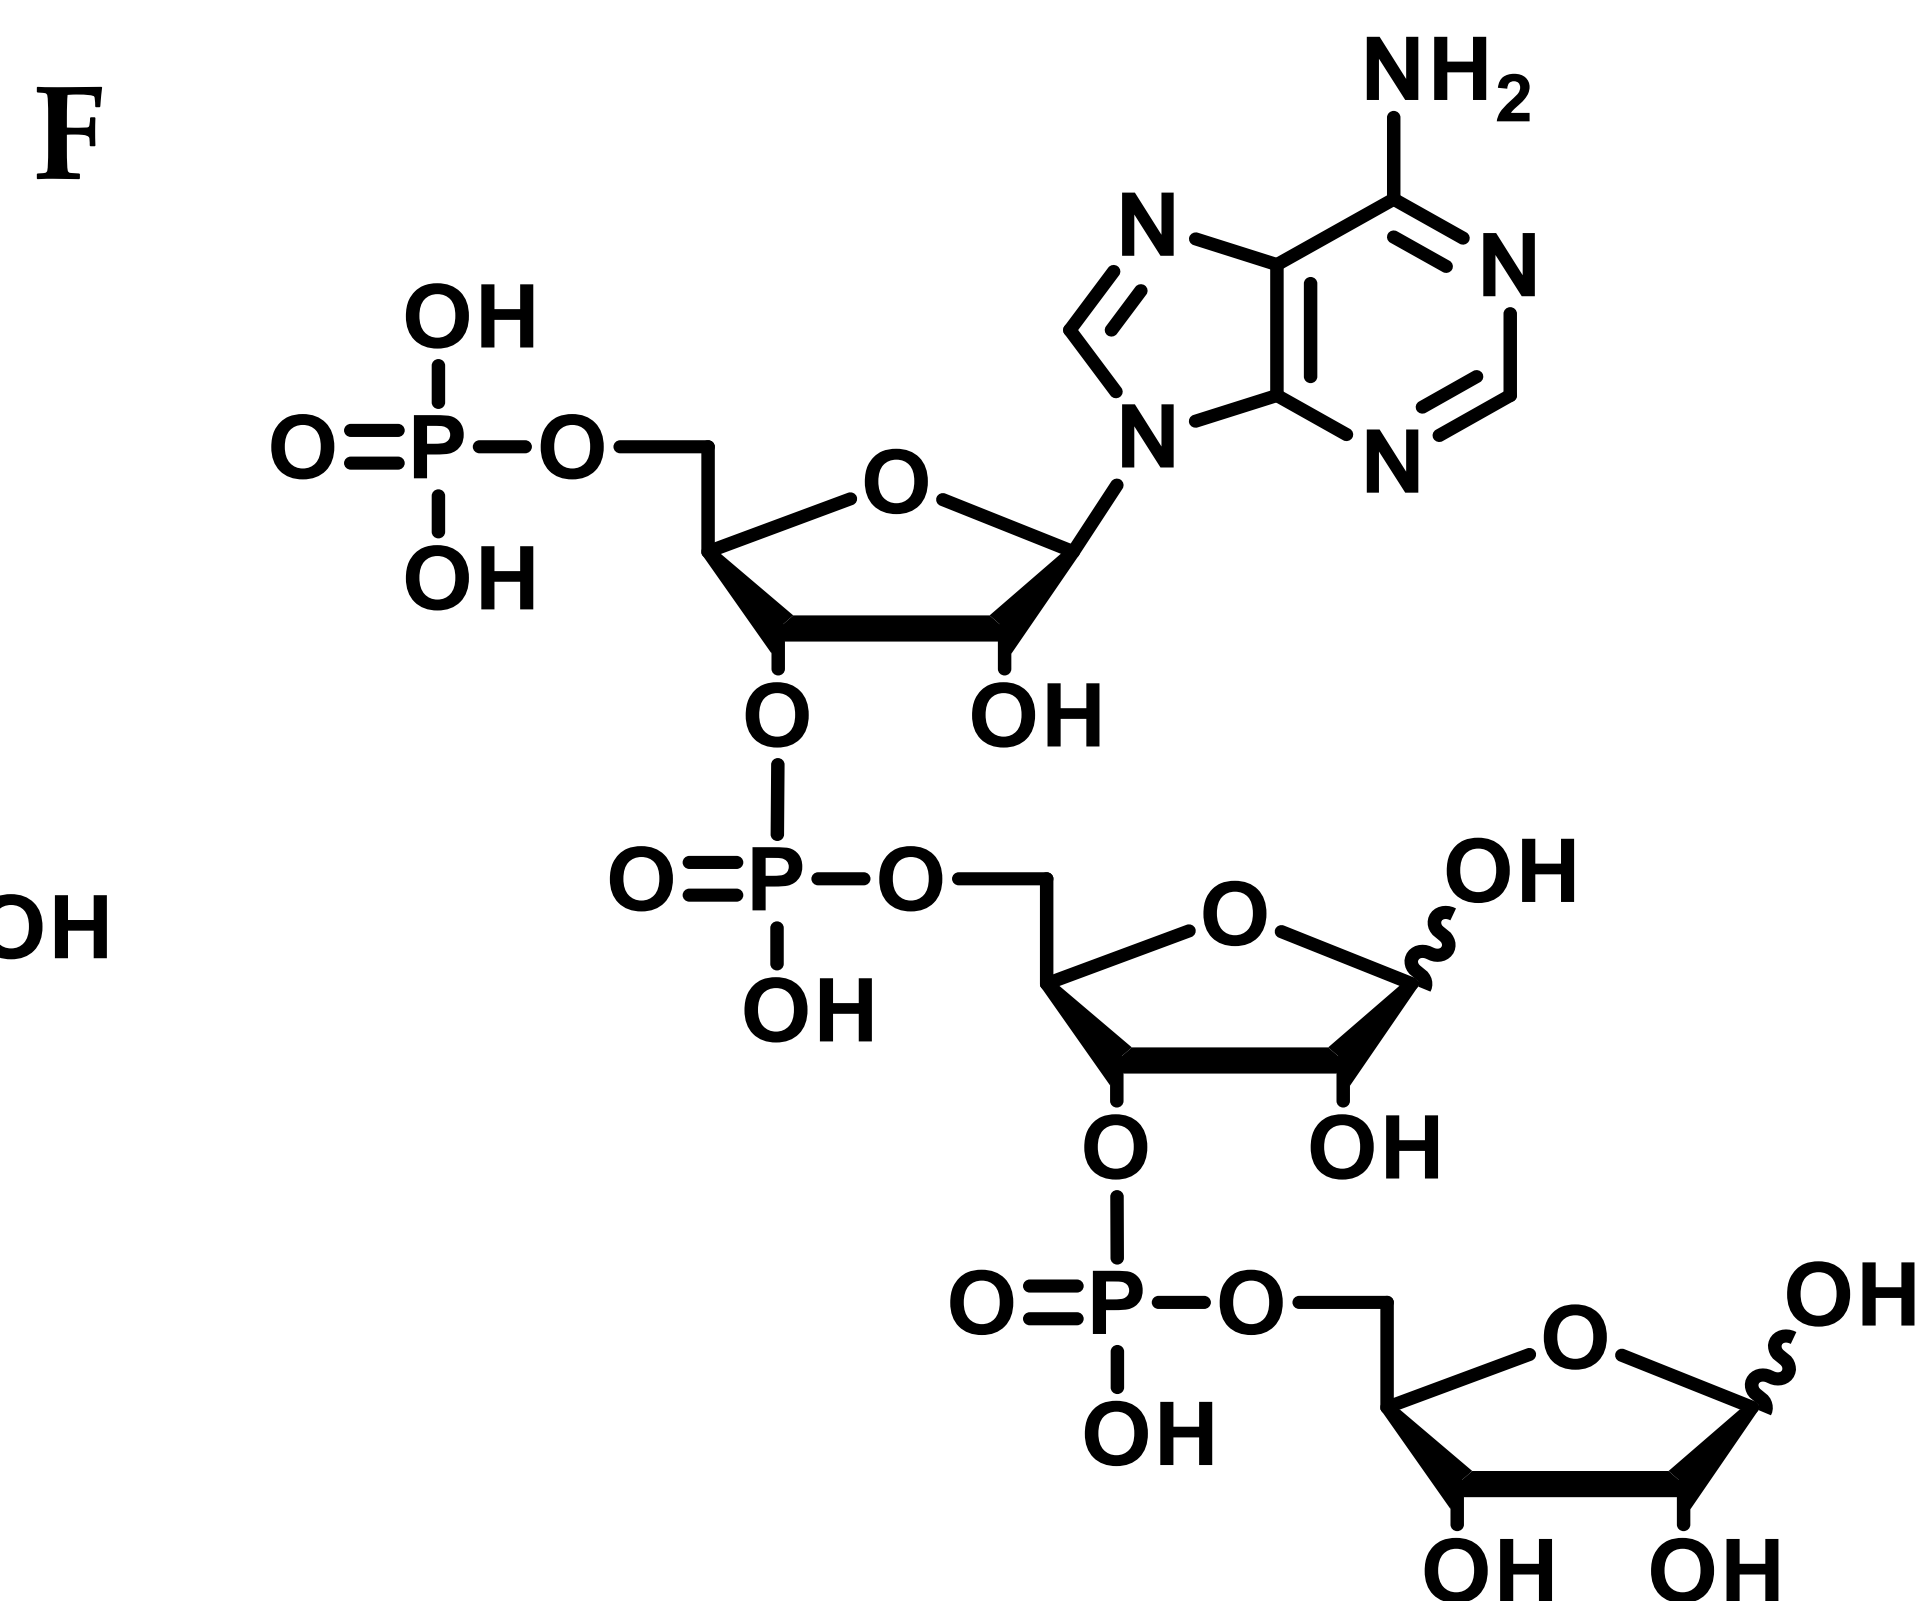

Abasic AMP Trimer

**Supplementary Figure S4:** Analysis of deglycosylation of nucleotides when heated at 90 °C, pH 2 under aq. solution .

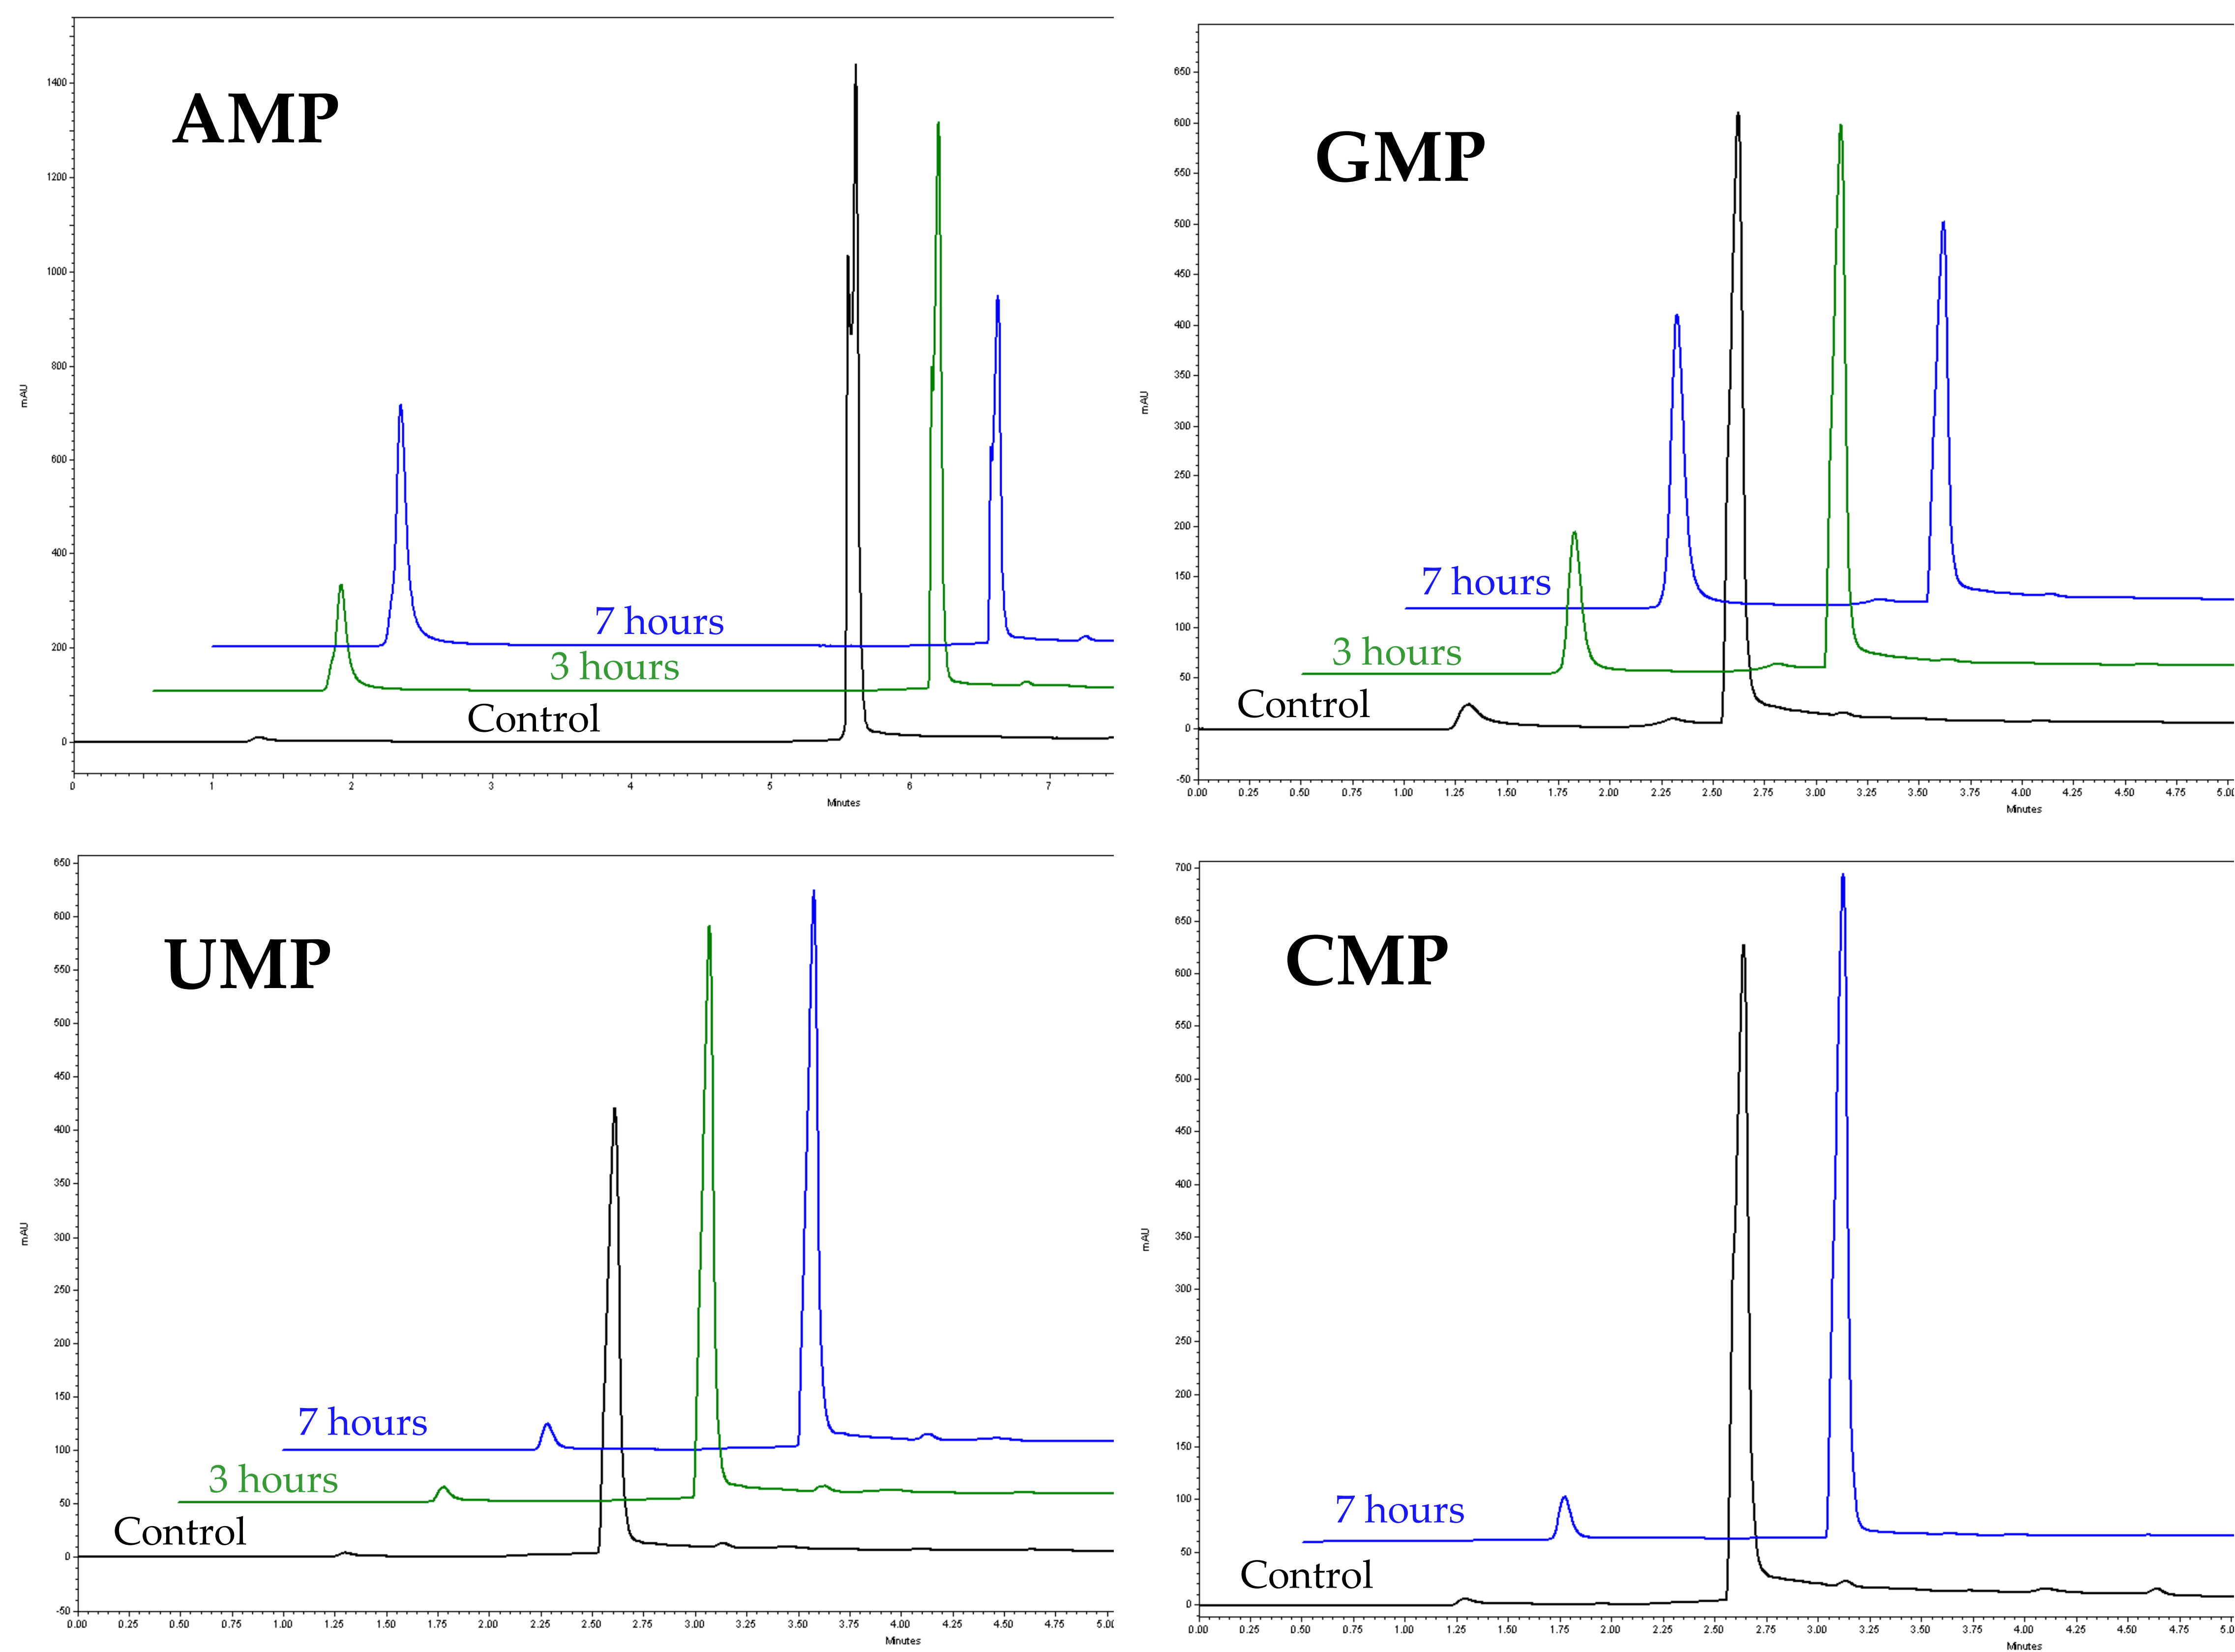

Supplement: s1 [file s1]
